# Supplementary material
Source: Springer Nature journal article supplement (https://www.springermedizin.de/resource/supplementary/13613_2011_1_MOESM1_ESM.pdf/15427238)
Supplement: MOESM1 [file 15427238]

**Stroke volume**

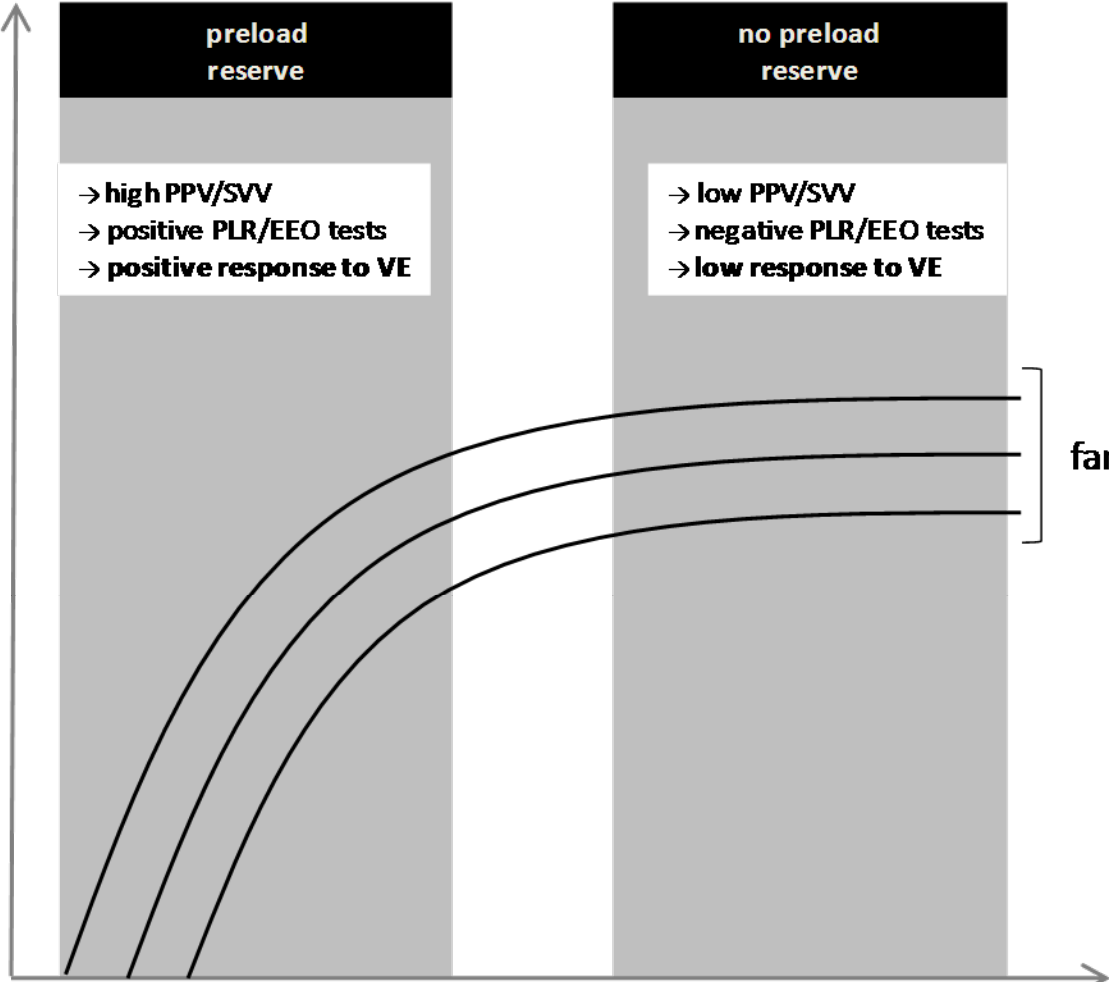

**preload reserve**

- **high PPV/SVV**
- **positive PLR/EEO tests**
- **positive response to VE**

**no preload reserve**

- **low PPV/SVV**
- **negative PLR/EEO tests**
- **low response to VE**

} **family of curves**

**Cardiac preload**
